# 1 Calcium Sensing Receptor Common Variants Influence the Effects of 2 Serum Calcium on Coronary Artery Disease Risks

3 Diane T. Smelser, PhD,<sup>1§</sup>, Fadil M. Hannan, DPhil,<sup>2,3§</sup>, Raghu P.R. Metpally, PhD,<sup>1</sup>,  
4 Sarathbabu Krishnamurthy, MS,<sup>1</sup>, David J. Carey, PhD,<sup>1</sup>, Rajesh V. Thakker, MD,<sup>3</sup>, Gerda E.  
5 Breitwieser, PhD,<sup>1</sup>, on behalf of the Regeneron Genetics Center,<sup>4</sup>.

6 <sup>1</sup>Weis Center for Research, Geisinger, Danville, PA, USA

7 <sup>2</sup>Nuffield Department of Women's & Reproductive Health, University of Oxford, Oxford, UK

8 <sup>3</sup>Academic Endocrine Unit, Radcliffe Department of Medicine, University of Oxford, Oxford, UK

9 <sup>4</sup>Regeneron Genetics Center, Tarrytown, NY, USA

10 §DTS and FMH contributed equally.

11 Short title: CASR SNPs Influence Calcium Effects on CAD

12 Keywords: Calcium Sensing Receptor; Coronary Artery Disease; Serum Calcium; Single  
13 Nucleotide Polymorphisms; Haplotypes; Arg990Gly.

14 Disclosures: The authors have nothing to disclose.

15 WORD COUNT: Abstract-Figure Legends/4822 words

16 DISCLOSURE STATEMENT: The authors have nothing to disclose.

17 Corresponding author: Gerda E. Breitwieser, [gebreitwieser@geisinger.edu](mailto:gebreitwieser@geisinger.edu), Weis Center for  
18 Research, Department of Molecular and Functional Genomics, Geisinger Clinic, 100 N.  
19 Academy Avenue, Danville PA 17822-2604.

20

1 **Abstract**

2 **Rationale:** The calcium-sensing receptor (CaSR) regulates serum calcium concentrations and  
3 common single nucleotide polymorphisms (SNPs) in a carboxyl terminal tri-locus haplotype block  
4 contribute to serum calcium variance in the general population. Altered serum calcium  
5 concentrations are associated with coronary artery disease (CAD), but direct role for CaSR in  
6 CAD remains to be determined.

7 **Methods:** We evaluated the associations of serum calcium and common *CASR* SNPs or the tri-  
8 locus haplotype block with major diseases including CAD in 51,289 patients from the DiscovEHR  
9 cohort derived from a single US health care system.

10 **Results:** Serum calcium concentrations were positively associated with the risk of CAD, and this  
11 risk was modified by common *CASR* SNPs. The Ala986Ser SNP was positively associated with  
12 hypercalcemia. Carriers of Ala986Ser had a significantly increased CAD risk whereas Arg990Gly  
13 carriers had a reduced risk relative to the reference SNP, for those with albumin-corrected serum  
14 calcium from 8.5-9.5 mg/dL. In the context of the tri-locus haplotype, the reduced CAD risk  
15 conferred by Arg990Gly remained significant. Analysis of the association of common *CASR* SNPs  
16 with CAD risk factors showed Arg990Gly was negatively associated with the CAD risk factor of  
17 chronic kidney disease, but independent of alterations in lipids, hemoglobin A1c, or blood  
18 pressure.

19 **Conclusions:** This study compares the common approach of single SNP analysis with the impact  
20 of a common variant haplotype block and refocuses attention on the CaSR Arg990Gly SNP which  
21 reduces the risk of CAD over a specific range of median albumin-corrected calcium  
22 concentrations.

23

1 **Précis**

2 Clinical data and whole exome sequences from a cohort of 51,289 individuals (DiscovEHR) were  
3 used to assess the independent contributions of serum  $\text{Ca}^{2+}$  and *CASR* common variants to  
4 cardiovascular diseases including CAD.

5

## 1 Introduction

2 The calcium-sensing receptor (CaSR), encoded by the *CASR* gene on chromosome 3q21.1, is a  
3 1078 amino acid family C G protein-coupled receptor (GPCR) that is highly expressed in  
4 calcitropic tissues including the parathyroid glands and kidneys, where it regulates serum  $\text{Ca}^{2+}$   
5 concentrations by influencing parathyroid hormone (PTH) secretion and renal  $\text{Ca}^{2+}$  excretion.<sup>1</sup>  
6 The CaSR represents a major determinant of extracellular  $\text{Ca}^{2+}$  homeostasis, and a haplotype  
7 block containing a cluster of 3 polymorphisms which localize to the intracellular carboxyl terminus  
8 (Ala986Ser, Arg990Gly, and Glu1011Gln) has been shown to contribute to the variance in serum  
9  $\text{Ca}^{2+}$  in the general population, and to influence urinary  $\text{Ca}^{2+}$  excretion.<sup>2,3</sup> The Ala986Ser SNP has  
10 been linked to higher serum calcium concentrations in the normal range by Genome-Wide  
11 Association Studies (GWAS).<sup>2</sup> In contrast, the Arg990Gly SNP has a mild gain-of-function  
12 phenotype<sup>4</sup> linked to lower serum calcium concentrations in the normal range, higher sensitivity  
13 to the calcimimetic drug cinacalcet (Sensipar<sup>TM</sup>)<sup>5</sup>, and elevated urinary  $\text{Ca}^{2+}$  and nephrolithiasis  
14 in some, but not all studies.<sup>6</sup>

15 The CaSR is also expressed in non-calcitropic tissues including heart and arterial vessels<sup>7</sup>, and  
16 has been implicated in the pathogenesis of cardiovascular disease (CVD). The common *CASR*  
17 SNP Ala986Ser has been associated with an increased prevalence of coronary artery disease  
18 (CAD), myocardial infarction (MI) and all-cause cardiovascular mortality in hospitalized patients  
19 who had undergone coronary angiography.<sup>8</sup> However, it is unclear whether the CaSR may  
20 influence CVD risk through direct effects on the heart and arterial vessels or by indirectly altering  
21 serum  $\text{Ca}^{2+}$  concentrations. Indeed, serum  $\text{Ca}^{2+}$  represents a CVD risk factor and calcium  
22 supplements, which increase serum  $\text{Ca}^{2+}$  concentrations, have been independently associated  
23 with CVD risk, cardiovascular and all-cause mortality.<sup>9,10</sup> Moreover, a large-scale Mendelian  
24 randomization study found that SNPs in  $\text{Ca}^{2+}$ -regulating genes were significantly associated with  
25 both increased serum  $\text{Ca}^{2+}$  concentrations and CAD; however whilst the *CASR* Ala986Ser SNP

1 had the greatest influence on serum  $\text{Ca}^{2+}$  concentrations, it was not significantly associated with  
2 CAD.<sup>11</sup> It thus remains to be established whether the cardiovascular effects of serum  $\text{Ca}^{2+}$  are  
3 mediated by, occur independently of or in conjunction with common *CASR* variants. Furthermore,  
4 association studies characterizing the influence of *CASR* variants and serum  $\text{Ca}^{2+}$  on calcitropic  
5 and non-calcitropic disorders have been hampered by small samples sizes, and meta-analyses  
6 are limited by the use of data from heterogeneous populations. To overcome these difficulties, we  
7 utilized clinical, biochemical and whole exome sequences from a single patient cohort comprising  
8 51,289 individuals derived from a stable US population of European origin. We assessed the  
9 independent contributions of serum  $\text{Ca}^{2+}$  and *CASR* common variants to cardiovascular diseases  
10 including CAD.

## 11 **Methods**

### 12 **DiscovEHR PATIENT COHORT**

13 The cohort consisted of 51,289 patients with a median age of 61 years (interquartile range 48-72  
14 years) (Table S1), from the Geisinger Health System (GHS) who consented to participate in the  
15 MyCode Community Health Initiative<sup>12</sup>, and whose germ-line DNA underwent whole exome  
16 sequencing (DiscovEHR).<sup>13</sup>

### 17 **CLINICAL DATA**

18 The medians and means of all available serum biochemical and clinical parameters were  
19 extracted from the electronic health record (EHR) in a de-identified manner. Patients studied had  
20 a median value of 14 years of EHR data (Table S1). We denote serum  $\text{Ca}^{2+}$  concentrations  
21 extracted from the available EHR data for each patient and taken only from outpatient visits as  
22 lifetime median ( $\text{LM}_{\text{EHR}}$ ) serum  $\text{Ca}^{2+}$ . For individuals with available albumin concentrations,  
23 median serum  $\text{Ca}^{2+}$  levels were adjusted, as follows: (adjusted  $\text{Ca}^{2+}$  ( $\text{Ca}^{2+}_{\text{alb}}$ ) = total serum  $\text{Ca}^{2+}$   
24 (mg/dL) + 0.8\*(4-serum albumin (mg/dL)). Unique International Classification of Disease-9 (ICD9)

1 codes for each de-identified patient were obtained from an approved data broker in accordance  
2 with Institutional Review Board approvals.

### 3 **EXOME SEQUENCING**

4 Sample preparation, exome sequencing, sequence alignment, variant identification, genotype  
5 assignment and quality control steps (allele balance < 0.7, high quality combined allele read  
6 depth (AD) of  $\geq 8$  reads, and per sample genotype quality (GQ) of  $\geq 30$ ) have been previously  
7 described.<sup>13</sup>

### 8 **ASSOCIATION STUDIES**

9 ICD9 codes that were recorded for a minimum of 200 patients (3 or more independent encounters  
10 per patient) were grouped into Phenome-Wide Association Study (PheWAS) codes  
11 (Phecodes).<sup>14,15</sup> Non-Europeans were excluded, as was one sample from pairs of closely related  
12 individuals up to first cousins. Analyses were adjusted for sex, age, age<sup>2</sup> and first 4 principal  
13 components. Association analyses between CASR SNPs and Phecodes were run with R (3.2)  
14 and plotted with GraphPad Prism (V.6).<sup>16</sup> SAS 9.4 for Windows (SAS Institute, Inc.) was used to  
15 analyze associations between common variants or haplotypes and continuous variables, using  
16 general linear models (GLM), controlling for age and sex. Pairwise comparisons of haplotypes  
17 were performed with least square means, and significant differences between clinical codes,  
18 complex phenotypes and/or clinical lab values and genotype were determined by Chi-squared  
19 analysis with Yates' correction, presented as two-tailed p-values. Contributions of CASR SNPs  
20 or haplotypes to serum Ca<sup>2+</sup> variations were determined by General Mixed Models, using the  
21 albumin-corrected median serum Ca<sup>2+</sup> levels, corrected for age, sex, and BMI.

## 22 **Results**

### 23 **Association of serum Ca<sup>2+</sup> concentrations with common CASR variants**

1 An exome-wide association study was used to determine the association between mean serum  
2  $\text{Ca}^{2+}$  concentrations and common *CASR* SNPs in the 51,289 patient DiscovEHR cohort. Results  
3 showed significant associations at the *CASR* locus (Figure S1). As previously reported<sup>8</sup>, the  
4 strongest positive association was with the Ala986Ser (rs1801725) *CASR* SNP ( $p=1.6\text{E-}70$ ;  
5  $\text{beta}=0.07255$ ), whilst a negative association was identified for Arg990Gly (rs1042636) ( $p=5.75\text{E-}$   
6  $15$ ;  $\text{beta}=-0.0442$ ) (Figure S1). The *CaSR* carboxyl terminus contains a cluster of SNPs  
7 (Ala986Ser, Arg990Gly and Glu1011Gln) in a haplotype block that has been associated with  
8 serum  $\text{Ca}^{2+}$  concentrations.<sup>3,17</sup> We determined the distribution of haplotypes in the 51,289  
9 DiscovEHR cohort, and assessed their effect(s) on median serum  $\text{Ca}^{2+}_{\text{alb}}$ . Haplotypes that include  
10 the Ser986 allele associate with the highest serum  $\text{Ca}^{2+}_{\text{alb}}$  concentrations, whereas haplotypes  
11 containing Gly990 alleles associate with the lowest serum  $\text{Ca}^{2+}_{\text{alb}}$  concentrations in the normal  
12 range (Table 1;  $P<0.0001$ ). The proportion of serum  $\text{Ca}^{2+}$  variation accounted for by the  
13 Ala986Ser SNP was 6.3%, and by the Arg990Gly SNP was 5.4% (controlling for age, sex, and  
14 BMI). None of the haplotypes were significantly associated with serum phosphate or PTH  
15 concentrations (Table 1; statistical analysis in Supplemental Table 2).

### 16 **Association of Common *CASR* Variants with Major Disease Phenotypes**

17 A phenome-wide association study (PheWAS) using EHR-derived phenotypes<sup>14-16</sup> identified  
18 significant disease associations for patients heterozygous ( $n=7,691$ ) or homozygous ( $n=721$ ) for  
19 the *CASR* Ala986Ser SNP, including hypercalcemia ( $p=5.9\text{E-}5$ ,  $\text{beta}=0.404$ )  
20 hyperparathyroidism, and disorders of mineral metabolism (Figure 1A, Table 2). Both the  
21 Ala986Ser and Arg990Gly SNPs were associated with CVD and the strongest associations for  
22 the Ala986Ser SNP include an increased risk of peripheral circulatory disorders and paroxysmal  
23 ventricular tachycardia (Figure 1A, Table 2), while the strongest associations for the Arg990Gly  
24 SNP showed a reduced risk of chronic ischemic heart disease, unstable angina and myocardial  
25 infarction (Figure 1B, Table 2).

## 1 **Serum Ca<sup>2+</sup> and CASR Variants Modulate Coronary Artery Disease Risk**

2 Associations of the common CASR SNPs Ser986 and Gly990 with a range of cardiovascular  
3 disease ICD9 codes prompted an in-depth analysis of their respective impacts on CAD, a well-  
4 defined clinical phenotype. CAD patients were defined by an EHR history of coronary  
5 revascularization, or history of acute coronary syndrome, ischemic heart disease or exertional  
6 angina (ICD9 codes 410\*-414\*) with angiographic evidence of obstructive CAD (>50% stenosis  
7 in at least one major epicardial vessel as determined by catheterization).<sup>13,18</sup> Controls were  
8 individuals without any case criteria or any single encounter or problem list diagnosis code  
9 indicating CAD.

10 We first used LM<sub>EHR</sub> serum Ca<sup>2+</sup><sub>alb</sub> ranges as a categorical variable to determine the relative CAD  
11 risks of the CASR SNPs Ser986 and Gly990 relative to individuals having all reference alleles  
12 (WT=Ala986/Arg990/Glu1011). CAD cases were sorted by LM<sub>EHR</sub> serum Ca<sup>2+</sup><sub>alb</sub> range and  
13 genotype, and plotted over the range of LM<sub>EHR</sub> serum Ca<sup>2+</sup><sub>alb</sub> from 8.5 to 10.0 mg/dL (Figure 2A).  
14 Individuals having one or two Ser986 alleles had a CAD risk in each Ca<sup>2+</sup> range comparable to  
15 the reference allele (WT), while those having one or two Gly990 alleles had a significantly reduced  
16 CAD risk relative to Ser986 (O.R. = 0.762, 95% C.I. 0.603-0.96; p=0.021) or WT (O.R. = 0.81,  
17 C.I. 0.66-0.98; p=0.034). CAD risks increased with LM<sub>EHR</sub> serum Ca<sup>2+</sup><sub>alb</sub> range for Gly990 (8.5-  
18 9.0 mg/dL vs 9.5-10 mg/dL, O.R. = 1.53, C.I. 1.14-2.06; p=0.0053) and WT (8.5-9.0 mg/dL vs 9.5-  
19 10 mg/dL, O.R. = 1.3, C.I. 1.13-1.5, p=0.0003). When analyses were corrected for the well-  
20 established CAD risk factors of age, sex, and BMI, the Gly990 genotype was shown to be an  
21 independent factor which significantly decreased the risk of CAD when LM<sub>EHR</sub> serum Ca<sup>2+</sup><sub>alb</sub> is in  
22 the 8.5-9.0 mg/dL range (Figure 2B).

23 We next determined whether CAD risks are modified in the context of the carboxyl terminal  
24 haplotype (Figure 2C). In this case, one or two Ser986 alleles for patients in the 8.5-9.0 mg/dL  
25 LM<sub>EHR</sub> Ca<sup>2+</sup><sub>alb</sub> range significantly increased CAD risk compared with individuals with one or two



1 Gly990 alleles (O.R.= 1.74, C.I. 1.3-2.32,  $p=0.0002$ ). Likewise, CAD risk was significantly higher  
2 for individuals with Ser986 allele(s) than those with the reference haplotype (O.R. = 1.35, C.I.  
3 1.09-1.65,  $p=0.0058$ ) over the same  $LM_{EHR} Ca^{2+}_{alb}$  range (Figure 2C). CAD risk was also higher  
4 for the Ser986 relative to the Gly990 allele in the serum  $Ca^{2+}_{alb}$  range from 9.0-9.5 mg/dL (O.R. =  
5 1.23, C.I. 1.05-1.45,  $p=0.0103$ ) (Figure 2C). When compared with the WT haplotype, those  
6 having the Gly990 allele had a reduced CAD risk in the 8.5-9.0 mg/dL serum  $Ca^{2+}_{alb}$  range (O.R.  
7 = 0.805, C.I. 0.66-0.98,  $p=0.034$ ). CAD risk for patients having median serum  $Ca^{2+}_{alb}$  levels above  
8 9.5 mg/dL was independent of genotype (Figure 2C). We corrected the analysis of haplotype  
9 associated CAD risks for age, sex and BMI (Figure 2D), and results again demonstrated the  
10 importance of the Gly990 allele as an independent determinant of reduced CAD risk. Finally, we  
11 analyzed the effect of *CASR* haplotype on CAD risk, using  $LM_{EHR} Ca^{2+}_{alb}$  as a continuous variable.  
12 CAD risk is associated with serum  $Ca^{2+}$  even for individuals having the reference haplotype,  
13 increasing 2.7% per 0.1 mg/dL of serum  $Ca^{2+}$ , while CAD risk increased by 1.9% per 0.1 mg/dL  
14 of  $Ca^{2+}$  for carriers of Ser986 alleles, and by 5.5% for each 0.1 mg/dL of  $Ca^{2+}$  for carriers of Gly990  
15 alleles. Overall, results demonstrate that presence of the Gly990 allele significantly reduces CAD  
16 risk in the 8.5-9.0 mg/dL serum  $Ca^{2+}_{alb}$  range, and that both serum  $Ca^{2+}$  and *CASR* haplotype are  
17 strongly associated with CAD risk.

18 *CaSR* is highly expressed in the pancreatic islets and kidneys.<sup>19-21</sup> We therefore determined  
19 whether the Ser986 or Gly990 *CASR* SNPs influenced CAD risk through differential effects on  
20 the prevalence of type 2 diabetes (T2D) or chronic kidney disease (CKD). Individuals  
21 homozygous for the Ser986 SNP had a small but significant increase in the prevalence of T2D in  
22 the 51,289 individual DiscovEHR cohort (Figure S2D), but the *CASR* SNPs had no differential  
23 effects on other cardio-metabolic risk factors, including dyslipidemia ICD9 calls or blood pressure  
24 (Figures S2ABC), glycemia (hemoglobin A1c concentrations, Figure S2E), estimated glomerular  
25 filtration rate (Figure S2F) or serum lipids (Figure S3). It should be noted that drug treatments for

1 diabetes and/or dyslipidemia may obscure the full effect of the CaSR variants on these measures.  
2 Individuals homozygous for the Gly990 SNP in the background of the reference alleles at both of  
3 the other common SNPs in the haplotype had a significantly reduced prevalence of CKD (stages  
4 4 (ICD9 code 585.4) + 5 (585.5) + unspecified (585.9), but excluding end stage renal disease  
5 (585.6), Figure 3A), which was reflected in significantly lower serum creatinine levels (Figure 3B).  
6 Overall, results suggest that *CASR* common variants modify the effect of serum Ca<sup>2+</sup> on CAD,  
7 either directly and/or by effects in the kidney.

## 8 **Discussion**

9 The availability of whole exome sequencing coupled with phenotype-rich electronic health record  
10 data has provided a unique opportunity to define cardiovascular and other disease associations  
11 for common *CASR* variants, and dissect the contribution of serum Ca<sup>2+</sup> to CAD risk. Our studies  
12 have revealed that serum Ca<sup>2+</sup> concentrations are positively associated with the risk of CAD in  
13 patients who are not carriers of CaSR common variants, demonstrating that serum Ca<sup>2+</sup> likely  
14 influences CVD independent of its effects on the CaSR. These findings are consistent with  
15 previous observational studies, which have shown that an ~0.1 mmol/L increase in serum Ca<sup>2+</sup>  
16 concentrations is associated with an ~10% increase in the relative risk of cardiovascular events.<sup>22</sup>  
17 Furthermore, we have dissected the associations of common *CASR* variants with CAD over  
18 defined ranges of serum Ca<sup>2+</sup> concentrations, and demonstrate that common *CASR* variants  
19 modify the effect of serum Ca<sup>2+</sup> on CAD. Our stepwise analysis argues that analysis of single  
20 SNPs in a linked haplotype block containing multiple common variants may not take into account  
21 all determinants of CAD risk. Therefore, the *CASR* tri-locus haplotype  
22 (Ala986Ser/Arg990Gly/Glu1011Gln) should be used to assess disease risks, as the interaction(s)  
23 of risk and protective alleles both need to be taken into account. When considered alone, the  
24 *CASR* carboxyl terminal Ser986 SNP significantly increased CAD risk, confirming a previous  
25 study<sup>8</sup>, whilst the Gly990 SNP significantly reduced this risk. These opposing effects of the CaSR

1 SNPs on CAD risk occurred at serum  $\text{Ca}^{2+}$  concentrations in the range between 8.5-9.5 mg/dL,  
2 which accounts for the majority (83%) of patients in the CAD analysis. When considered within  
3 the tri-locus haplotype, the reduced risk conferred by the Arg990Gly SNP remained significant.  
4 Of note, the frequency of the Arg990Gly SNP varies among ethnicities (1000Genomes), and may  
5 contribute to observed differential risks of CAD in different populations. The finding that these  
6 associations of the *CASR* SNPs with CAD occurred independently of cardio-metabolic risk factors  
7 such as blood pressure, serum lipids or hemoglobin A1c concentrations, highlights a potential  
8 role for CaSR expressed in the cardiovascular system in the pathogenesis of CAD. Indeed, the  
9 CaSR is expressed in the aorta and coronary arteries<sup>23</sup>, and abnormal function of the arterial  
10 CaSR has been implicated the pathogenesis of vascular calcification.<sup>24</sup> Moreover, we have shown  
11 that the homozygous Gly990 CaSR SNP is associated with a significant reduction in CKD cases.  
12 The relevance of this finding to the pathophysiology of CKD is uncertain, however, it is notable  
13 that studies involving rats have shown CaSR to protect against glomerular disease.<sup>25</sup> Moreover,  
14 as CKD represents a major cardiovascular risk factor, the reduction in CKD may in part explain  
15 why the Gly990 CaSR SNP is associated with a reduced risk of CAD. Furthermore, the Ser986  
16 CaSR SNP is associated with an increase in cases of type 2 diabetes, and these findings are in  
17 keeping with a reported study involving renal transplant recipients, which showed the Ser986 SNP  
18 to be associated with increased serum glucose concentrations.<sup>26</sup>

19 The approaches used in this study have notable benefits and a few limitations. Combining WES  
20 and quantitative clinical measures from a single large healthcare system allowed unequivocal  
21 definitions of cases and controls, improving the power to discern associations. Another benefit is  
22 the ability to study a broad range of clinical conditions in an unbiased manner. The de-identified  
23 nature of the data confers some limitations, including a lack of specialized clinical data and/or  
24 testing to support particular diagnoses, compounded by the inability to call back patients for  
25 additional phenotyping. These limitations promoted a focus on the CAD phenotype, which was

1 validated by angiographic evidence of obstructive CAD<sup>13,18</sup>. Finally, we did not explicitly address  
2 whether patients were on supplemental calcium  $\pm$  vitamin D, which may influence serum  $\text{Ca}^{2+}$   
3 concentrations, but rather focused on outpatient EHR-based median  $\text{Ca}^{2+}_{\text{alb}}$  levels to assess CAD  
4 risks. The large numbers of patients and extensive clinical measures did, however, allowed for  
5 statistically significant findings, and the present results argue for the importance of including  
6 *CASR* haplotypes in re-analyses of renal failure studies that use cinacalcet. Finally, large  
7 independent cohorts combining WES and granular EHR data are currently unavailable for  
8 replication of the observed associations. As other population sequencing efforts such as the UK  
9 Biobank and the National Institutes of Health Precision Health Initiative (All of Us) come to fruition,  
10 we expect replication to be possible. The present study can also be followed-up with an in-depth  
11 prospective study with specifically recruited patients who can undergo more rigorous testing.

12 In conclusion, common *CASR* SNPs within the carboxyl terminal tri-locus haplotype are  
13 significantly associated serum  $\text{Ca}^{2+}$  and with cardiovascular diseases, and modify the effects of  
14 serum calcium on CAD risk, independently of other risk factors.

## 15 **Acknowledgements**

16 We thank the Phenotype Core at Geisinger for providing de-identified clinical data, and the  
17 patients who contributed to MyCode to make these studies possible. We thank Dr. Janet  
18 Robishaw for comments on an early version of the manuscript. This work is supported by a  
19 Wellcome Trust Investigator Award, National Institute for Health Research Senior Investigator  
20 Award, and National Institute for Health Research Oxford Biomedical Research Centre  
21 Programme (Prof. Thakker).

22

## 1   **References**

- 2   1. Hannan FM, Babinsky VN, Thakker RV. Disorders of the calcium-sensing receptor and  
3       partner proteins: insights into the molecular basis of calcium homeostasis. *J Mol Endocrinol.*  
4       2016;57:R127-R142.
- 5   2. Kapur K, Johnson T, Beckmann ND, Sehmi J, Tanaka T, Kutalik Z, Styrkarsdottir U, Zhang  
6       W, Marek D, Gudbjartsson DF, Milaneschi Y, Holm H, Diiorio A, Waterworth D, Li Y,  
7       Singleton AB, Bjornsdottir US, Sigurdsson G, Hernandez DG, Desilva R, Elliott P, Eyjolfsson  
8       GI, Guralnik JM, Scott J, Thorsteinsdottir U, Bandinelli S, Chambers J, Stefansson K,  
9       Waeber G, Ferrucci L, Kooner JS, Mooser V, Vollenweider P, Beckmann JS, Bochud M,  
10      Bergmann S. Genome-wide meta-analysis for serum calcium identifies significantly  
11      associated SNPs near the calcium-sensing receptor (CASR) gene. *PLoS Genet.*  
12      2010;6:e1001035.
- 13  3. Scillitani A., Guarnieri V, De Geronimo S, Muscarella LA, Battista C, D'Agruma L, Bertoldo  
14      F, Florio C, Minisola S, Hendy GN, Cole DE. Blood ionized calcium is associated with  
15      clustered polymorphisms in the carboxyl-terminal tail of the calcium-sensing receptor. *J Clin*  
16      *Endocrinol Metab.* 2004;89:5634-5638.
- 17  4. Vezzoli G, Terranegra A, Arcidiacono T, Biasion R., Coviello D., Syren ML, Paloschi V,  
18      Giannini S., Mignogna G, Rubinacci A, Ferraretto A, Cusi D, Bianchi G, Soldati L. R990G  
19      polymorphism of calcium-sensing receptor does produce a gain-of-function and predispose  
20      to primary hypercalciuria. *Kidney Int.* 2007;71:1155-1162.
- 21  5. Jeong S, Kim IW, Oh KH, Han N, Joo KW, Kim HJ, Oh JM. Pharmacogenetic analysis of  
22      cinacalcet response in secondary hyperparathyroidism patients. *Drug Design, Development*  
23      *and Therapy.* 2016;10:2211-2225.
- 24  6. Egbuna OI, Brown EM. Hypercalcaemic and hypocalcaemic conditions due to calcium-  
25      sensing receptor mutations. *Best Pract Res Clin Rheumatol.* 2008;22:129-148.

- 1 7. Toka HR, Pollak MR. The role of the calcium-sensing receptor in disorders of abnormal  
2 calcium handling and cardiovascular disease. *Curr Opin Nephrol Hypertension*.  
3 2014;23:494-501.
- 4 8. März W, Seelhorst U, Wellnitz B, Wellnitz B., Tiran B, Obermayer-Pietsch B, Renner W,  
5 Boehm BO, Ritz E, Hoffmann MM. Alanine to serine polymorphism at position 986 of the  
6 calcium-sensing receptor associated with coronary heart disease, myocardial infarction, all-  
7 cause, and cardiovascular mortality. *J Clin Endocrinol Metab*. 2007;92:2363-2369.
- 8 9. Thiele I, Linseisen J, Meisinger C, Schwab S, Huth C, Peters A, Perz S, Meitinger T,  
9 Krinenberg F, Lamina C, Thiery J, Koenig W, Rathmann W, Kaab S, Then SC, Seissler J,  
10 Thorand B. Associations between calcium and vitamin D supplement use as well as their  
11 serum concentrations and subclinical cardiovascular disease phenotypes. *Atherosclerosis*.  
12 2015;241:743-751.
- 13 10. Challoumas D, Cobbold C, Dimitrakakis G. Effects of calcium intake on the cardiovascular  
14 system in postmenopausal women. *Atherosclerosis*.2013;231:1-7.
- 15 11. Larsson SC, Burgess S, Michaelsson K. Association of genetic variants related to serum  
16 calcium levels with coronary artery disease and myocardial infarction. *JAMA*. 2017;318:371-  
17 380.
- 18 12. Carey DJ, Fetterolf SN, Davis FD, Faucett WA, Kirchner HL, Mirshahi U, Murray MF,  
19 Smelser DT, Gerhard GS, Ledbetter DH. The Geisinger MyCode community health initiative:  
20 an electronic health record-linked biobank for precision medicine research. *Genet Med*.  
21 2016;18:906-913.
- 22 13. Dewey FE, Gusarova V, O'Dushlaine C, Gottesman O, Trejos J, Hunt C, Van Hout CV,  
23 Habegger L, Buckler D, Lai KM, Leader JB, Murray MF, Ritchie MD, Kirchner HL, Ledbetter  
24 DH, Penn J, Lopez A, Borecki IB, Overton JD, Reid JG, Carey DJ, Murphy AJ, Yancopoulos  
25 GD, Baras A, Gromada J, Shuldiner AR. Inactivating variants in ANGPTL4 and risk of  
26 coronary artery disease. *N Engl J Med*. 2016;374:1123-1133.

- 1 14. Verma A, Leader JB, Verma SS, Frase A, Wallace J, Dudek S, Lavage DR, Van Hout CV,  
2 Dewey FE, Penn J, Lopez A, Overton JD, Carey DJ, Ledbetter DH, Kirchner HL, Ritchie MD,  
3 Pendergrass SA. Integrating clinical laboratory measures and ICD-9 code diagnoses in  
4 phenome-wide association studies. *Pac Symp Biocomput.* 2016;21:168-179.
- 5 15. Wei WQ, Bastarache LA, Carroll RJ, Marlo JE, Osterman TJ, Gamazon ER, Cox NF, Roden  
6 DM, Denny JC. Evaluating phecodes, clinical classification software, and ICD-9-CM codes  
7 for phenome-wide association studies in the electronic health record. *PLoS One.*  
8 2017;12:e0175508.
- 9 16. Carroll RJ, Bastarache L, Denny JC. R PheWAS: data analysis and plotting tools for  
10 phenome-wide association studies in the R environment. *Bioinformatics.* 2014;30:2375-6.
- 11 17. O'Seaghdha CM, Wu H, Yang Q, Kapur K, Guessous I, Zuber AM, Kottgen A, Stoudmann  
12 C, Teumer A, Kutalik Z, Mangino M, Dehghan A, Zhang W, Eiriksdottir G, Li G, Tanaka T,  
13 Portas L, Lopez LM, Hayward C, Lohman K, Matsuda K, Padmanaghan S, Firsov D, Sorice  
14 R, Ulivi S, Brockhaus AC, Kleber ME, Mahajan A, Ernst FD, Gudnason V, Launer LJ, Mace  
15 A, Boerwinckle E, Arking DE, Tanikawa C, Nakamura Y, Brown MJ, Gaspoz JM, Theler JM,  
16 Siscovick DS, Psaty BM, Bergmann S, Vollenweider P, Vitart V, Wright AF, Zemunik T,  
17 Boban M, Kolcic I, Navarro P, Brown EM, Estrada K, Ding J, Harris Tb, Bandinelli S,  
18 Hernandez D, Singleton AB, Grotto G, Ruggiero D, d'Adamo AP, Robino A, Meitinger T,  
19 Meisinger C, Davies G, Starr JM, Chambers JC, Boehm BO, Winkelmann BR, Huang J,  
20 Murgia F, Wild SH, Campbell H, Morris AP, Franco OH, Hofman A, Uitterlinden AG,  
21 Rivadeneira F, Völker U, Hannemann A, Biffar R, Hoffmann W, Shin SY, Lescuyer P, Henry  
22 H, Schurmann C, SUNLIGHT Consortium; GEFOS Consortium, Munroe PB, Gasparini P,  
23 Pirastu N, Ciullo M, Geiger C, März W, Lind L, Spector TD, Smith AV, Rudan I, Wilson JF,  
24 Polasek O, Deary IJ, Pirastu M, Ferrucci L, Liu Y, Kestenbaum B, Kooner JS, Witteman JC,  
25 Nauck M, Kao WH, Wallaschofski H, Bonny O, Fox CS, Bochud M. Meta-analysis of

- 1 genome-wide association studies identifies six new loci for serum calcium concentrations.  
2 *PLoS Genet.* 2013;9(9):e1003796.
- 3 18. Dewey FE, Gusarova V, Dunbar RL, O'Dushlaine C, Schurmann C, Gottesman O, McCarthy  
4 S, Van Hout CV, Bruse S, Dansky HM, Leader JB, Murray MF, Ritchie MD, Kirchner HL,  
5 Habegger L, Lopez A, Penn J, Zhao A, Shao W, Stahl N, Murphy AJ, Hamon S, Bouzelmat  
6 A, Zhang R, Shumel B, Pordy R, Gipe D, Herman GA, Sheu WHH, Lee IT, Liang KW, Guo  
7 X, Rotter JI, Chen YI, Kraus WE, Shah SH, Damrauer S, Small A, Rader DJ, Wulff AB,  
8 Nordestgaard BG, Tybjaerg-Hansen A, van den Hoek AM, Princen HMG, Ledbetter DH,  
9 Carey DJ, Overton JD, Reid JG, Sasiela WJ, Banerjee P, Shuldiner AR, Borecki IB,  
10 Teslovich TM, Yancopoulos GD, Mellis SJ, Gromada J, Baras A. Genetic and  
11 pharmacologic inactivation of ANGPTL3 and cardiovascular disease. *N Engl J Med.*  
12 2017;377:211-221.
- 13 19. Squires PE, Jones PM, Younis MY, Hills CE. The calcium-sensing receptor and  $\beta$ -cell  
14 function. *Vitam Horm.* 2014;95:249-267.
- 15 20. Babinsky VN, Hannan FM, Ramracheya RD, Zhang Q, Nesbit MA, Hugill A, Bentley L,  
16 Hough A, Joynson E, Stewart M, Aggarwal A, Prinz-Wohlgenannt M, Gorvin CM, Kallay E,  
17 Wells S, Cox RD, Richards D, Rorsman P, Thakker RJ. Mutant mice with calcium-sensing  
18 receptor activation have hyperglycemia that is rectified by calcilytic therapy. *Endocrinol.*  
19 2017;158:2486-2502.
- 20 21. Graca JA, Schepelmann M, Brennan SC, Reens J, Chang W, Yan P, Toka H, Riccardi D,  
21 Price SA. Comparative expression of the extracellular calcium-sensing receptor in the  
22 mouse, rat and human kidney. *Am J Physiol Renal Physiol.* 2016;310:F518-F533.
- 23 22. Reid IR, Birstow SM, Bolland MJ. Calcium and cardiovascular disease. *Endocrinol Metab*  
24 *(Seoul).* 2017;32:339-349.
- 25 23. Smajilovic S, Tfelt-Hansen J. Calcium acts as a first messenger through the calcium-  
26 sensing receptor in the cardiovascular system. *Cardiovasc Res.* 2007;75:457-467.



- 1 24. Alam MU, Kirton JP, Wilkinson FL, Towers E, Sinha S, Rouhi M, Vizard TN, Sage AP,  
2 Martin D, Ward DT, Alexander MY, Riccardi D, Canfield AE. Calcification is associated with  
3 loss of functional calcium-sensing receptor in vascular smooth muscle cells. *Cardiovasc*  
4 *Res.* 2009;81:260-268.
- 5 25. Oh J, Beckmann J, Bloch J, Hettgen V, Mueller J, Li L, Hoemme M, Gross ML, Penzel R,  
6 Mundel P, Schaefer F, Schmitt CP. Stimulation of the calcium-sensing receptor stabilizes  
7 the podocyte cytoskeleton, improves cell survival, and reduces toxin-induced  
8 glomerulosclerosis. *Kidney Int.* 2011;80:483-492.
- 9 26. Babinsky VN, Hannan, FM, Youhanna SC, Maréchal C, Jadoul M, Devuyst O, Thakker RV.  
10 Association studies of calcium-sensing receptor (CaSR) polymorphisms with serum  
11 concentrations of glucose and phosphate, and vascular calcification in renal transplant  
12 recipients. *PLoS One.* 2015;10:30119459.

### 13 **Figure Legends**

#### 14 **Figure 1. Common CASR SNPs are associated with cardiovascular disorders. A.**

15 PheWAS analysis for those individuals that are homo- or heterozygous for the CASR Ala986Ser  
16 SNP. Analyzed phenotypes were defined as Phecodes (Methods) with  $n \geq 3$  calls and at least  
17 200 cases, independent of genotype. All results at  $p < 0.01$  presented in Table 2. **B.** PheWAS  
18 results for the Arg990Gly SNP, as described in **A.** All results at  $p < 0.01$  in Table 2.

#### 19 **Figure 2. CAD risk as a function of CASR SNPs and LM<sub>EHR</sub> serum Ca<sup>2+</sup><sub>alb</sub>. A.**

20 (#CAD patients/total patients of each genotype) was plotted for each Ala986Ser and  
21 Arg9990Gly SNPs (WT = Ala986, Arg990, Glu1011) in 0.5 mg/dL ranges of median serum  
22 Ca<sup>2+</sup><sub>alb</sub> from 8.5-10 mg/dL. The total number of patients in each median Ca<sup>2+</sup><sub>alb</sub> range is  
23 indicated on the graph. Inverted arrowheads mark the haplotype median Ca<sup>2+</sup><sub>alb</sub> values from  
24 Table 1; black circles, individuals with reference genotype at all positions; triangles, S986 homo-

1 plus heterozygous individuals; and squares, G990 homo- and heterozygous individuals.  
2 Statistical significance was determined by Chi-squared analysis with Yate's correction using  
3 GraphPad Prism (V6). **B.** Analysis of CAD risk as described in **A** for each CASR haplotype (WT  
4 haplotype = Ala986, Arg990, Glu1011). For the Ser986- or Gly990-containing haplotypes, other  
5 SNPs of the haplotype were reference. Black circles, individuals with reference genotype at all  
6 positions, triangles, S986 homo- plus heterozygous individuals, squares, G990 homo- and  
7 heterozygous individuals, with all other positions at reference allele. Statistical significance was  
8 determined by Chi-squared analysis with Yate's correction using GraphPad Prism (V6). **C.**  
9 Odds ratio (O.R.) analysis of CAD risk as a function of *CASR* SNP and LM<sub>EHR</sub> serum Ca<sup>2+</sup><sub>alb</sub>,  
10 compared to WT. Plotted are the odds ratios and 95% confidence intervals. Significant odds  
11 ratios are indicated with p-values determined by Chi-squared analysis. Analysis was corrected  
12 for age, sex, and BMI. Full analyses of the CAD risks and LM<sub>EHR</sub> Ca<sup>2+</sup><sub>alb</sub> dependencies are  
13 presented in Supplemental Table 3. **D.** Analysis of CAD risk as in **C.**, using haplotypes,  
14 compared with the WT haplotype. Statistical significance (Chi-squared analysis) indicated with  
15 p-values. CAD risks as a function of age, sex, and BMI are in Supplemental Table 4.

16 **Figure 3. CKD as a function of CASR SNPs.** **A.** Cases of chronic kidney disease (CKD\*,  
17 sum of individuals with at least 3 calls of ICD9 codes of 585.5, 585.6, or 585.9, with each patient  
18 represented only once at most severe code) as a function of common *CASR* variant genotype.  
19 Significance determined by chi-squared analysis (Fisher's exact test or Chi-squared with Yate's  
20 correction depending on the number of patients being compared). Total number of patients with  
21 each genotype are indicated in the bars. Individuals homozygous for the Gly990 SNP had a  
22 significantly reduced CKD\* risk compared with other genotypes. **B.** Mean of median creatinine  
23 values for all individuals homozygous for CASR common haplotypes, irrespective of CAD or  
24 CKD status. E1011(HO) denotes the reference haplotype (35,343 individuals), and there were  
25 1059 individuals homozygous for S986, 250 individuals homozygous for G990, and 165

- 1 individuals homozygous for Q1011. Significance was determined by two-tailed t-test assuming
- 2 unequal variance.
- 3

1 **Table 1. Common CASR carboxyl terminal haplotype distributions in 51,289 individual**  
 2 **DiscovEHR cohort.** Patients were sorted by CASR haplotype status and presented in order of  
 3 increasing median serum Ca<sup>2+</sup><sub>alb</sub> levels. Sequencing data was not explicitly phased; heterozygous  
 4 states are indicated by parentheses. Median Ca<sup>2+</sup><sub>alb</sub>, PTH and creatinine were averaged over all  
 5 patients having measurements in the EHR (standard deviation and number of individuals in  
 6 parentheses). Statistically significant comparisons of median serum Ca<sup>2+</sup><sub>alb</sub> are presented in  
 7 Table S2. There were no statistically significant differences among haplotypes for serum PTH or  
 8 creatinine.

| Genotype    | n      | Age (SD)   | Male % | Median Ca <sup>2+</sup> <sub>alb</sub> mg/dL (SD; n) | Serum PTH pg/dL (SD; n) | Serum creatinine mg/dL (SD; n) |
|-------------|--------|------------|--------|------------------------------------------------------|-------------------------|--------------------------------|
| A(R/G)(E/Q) | 301    | 59.2(18.3) | 39.5   | 9.13 (0.27; 105)                                     | 52.0 (29.6; 49)         | 0.90 (0.5; 178)                |
| ARE/AGE     | 5,424  | 58.7(18.1) | 41.3   | 9.16 (0.32; 4,344)                                   | 59.2 (49.1; 1,275)      | 0.92 (0.45; 3,135)             |
| AGE/AGE     | 289    | 58.4(18.3) | 37.0   | 9.17 (0.31; 221)                                     | 69.5 (116.6; 63)        | 0.90 (0.61; 145)               |
| ARE/ARE     | 27,938 | 59.0(17.8) | 40.5   | 9.2 (0.32; 22,855)                                   | 61.9 (75.8; 6,561)      | 0.91 (0.43; 16,081)            |
| ARE/ARQ     | 3,343  | 58.7(17.9) | 41.0   | 9.23 (0.32; 2,752)                                   | 63.63 (55.71; 788)      | 0.90 (0.39; 1,884)             |
| ARQ/ARQ     | 189    | 59.2(20.4) | 38.1   | 9.23 (0.37; 155)                                     | 82.3 (88.7; 54)         | 0.93 (0.31; 53)                |
| (A/S)(R/G)E | 1,032  | 58.7(17.7) | 40.0   | 9.24 (0.31; 840)                                     | 65.21 (66.57; 230)      | 0.88 (0.37; 615)               |
| ARE/SRE     | 10,910 | 59.2(17.7) | 42.1   | 9.27 (0.33; 8,899)                                   | 62.47 (49.74; 2,577)    | 0.91 (0.38; 6,364)             |
| (A/S)R(Q/E) | 607    | 58.8(17.8) | 44.8   | 9.28 (0.33; 498)                                     | 71.2 (101.2; 146)       | 0.93 (0.50; 329)               |
| SRE/SRE     | 1,214  | 60.5(16.9) | 39.1   | 9.36 (0.33; 980)                                     | 62.2 (55.9; 311)        | 0.94 (0.56; 676)               |

9

10  
11

1 **Table 2. Disease associations for carriers of common CASR SNPs.** Hetero- + homozygous  
 2 individuals were analyzed for each SNP. All ICD9 codes with a minimum of 200 patients,  
 3 independent of genotype, were assessed. Cases (# cases) were individuals with  $\geq 3$  instances of  
 4 a code, and controls (#controls) were individuals having no instances of the code. Presented are  
 5 calciotropic and cardiovascular phenotypes with p-value < 0.01, uncorrected for multiple testing  
 6 as this was an exploratory analysis. Associations with a reduced disease risk are shown in **bold**.

| Code                             | Code description                                | O.R. <sup>1</sup> | S.E. <sup>2</sup> | beta <sup>3</sup> | p-value        | # cases      | # controls    |
|----------------------------------|-------------------------------------------------|-------------------|-------------------|-------------------|----------------|--------------|---------------|
| <b>A986S (rs1801725)</b>         |                                                 |                   |                   |                   |                |              |               |
| <b>CALCIOTROPIC PHENOTYPES</b>   |                                                 |                   |                   |                   |                |              |               |
| <b>275.6</b>                     | Hypercalcemia                                   | 1.498             | 0.1005            | 0.4037            | 5.92E-5        | 308          | 28,403        |
| <b>275</b>                       | Disorders of mineral metabolism                 | 1.275             | .06784            | 0.249             | 0.000342       | 764          | 28,403        |
| <b>252.1</b>                     | Hyperparathyroidism                             | 1.245             | 0.0854            | 0.22              | 0.01           | 477          | 25,903        |
| <b>CARDIOVASCULAR PHENOTYPES</b> |                                                 |                   |                   |                   |                |              |               |
| <b>443.7</b>                     | Peripheral angiopathy                           | 1.574             | 0.149             | 0.453             | 0.00228        | 138          | 23,387        |
| <b>250.25</b>                    | Type 2 diabetes peripheral circulatory disorder | 1.551             | 0.1543            | 0.439             | 0.0045         | 132          | 17,740        |
| <b>394</b>                       | Chronic rheumatic disease of heart valves       | 1.319             | 0.107             | 0.277             | 0.00955        | 304          | 26,320        |
| <b>427.12</b>                    | Paroxysmal ventricular tachycardia              | 1.329             | 0.1103            | 0.2845            | 0.0099         | 281          | 20,249        |
| <b>R990G (rs1042636)</b>         |                                                 |                   |                   |                   |                |              |               |
| <b>CARDIOVASCULAR PHENOTYPES</b> |                                                 |                   |                   |                   |                |              |               |
| <b>411.8</b>                     | <b>Chronic ischemic heart disease</b>           | <b>0.814</b>      | <b>0.077</b>      | <b>-0.218</b>     | <b>0.0044</b>  | <b>1,832</b> | <b>22,130</b> |
| <b>411.1</b>                     | <b>Unstable angina</b>                          | <b>0.564</b>      | <b>0.203</b>      | <b>-0.572</b>     | <b>0.00486</b> | <b>298</b>   | <b>22,130</b> |
| <b>411.2</b>                     | <b>Myocardial infarction</b>                    | <b>0.826</b>      | <b>0.075</b>      | <b>-0.191</b>     | <b>0.01</b>    | <b>1,825</b> | <b>22,130</b> |

7 1. Odds ratio for code. 2. Standard error of odds ratio. 3. Beta value reflects effect size.

8

1 Figure 1

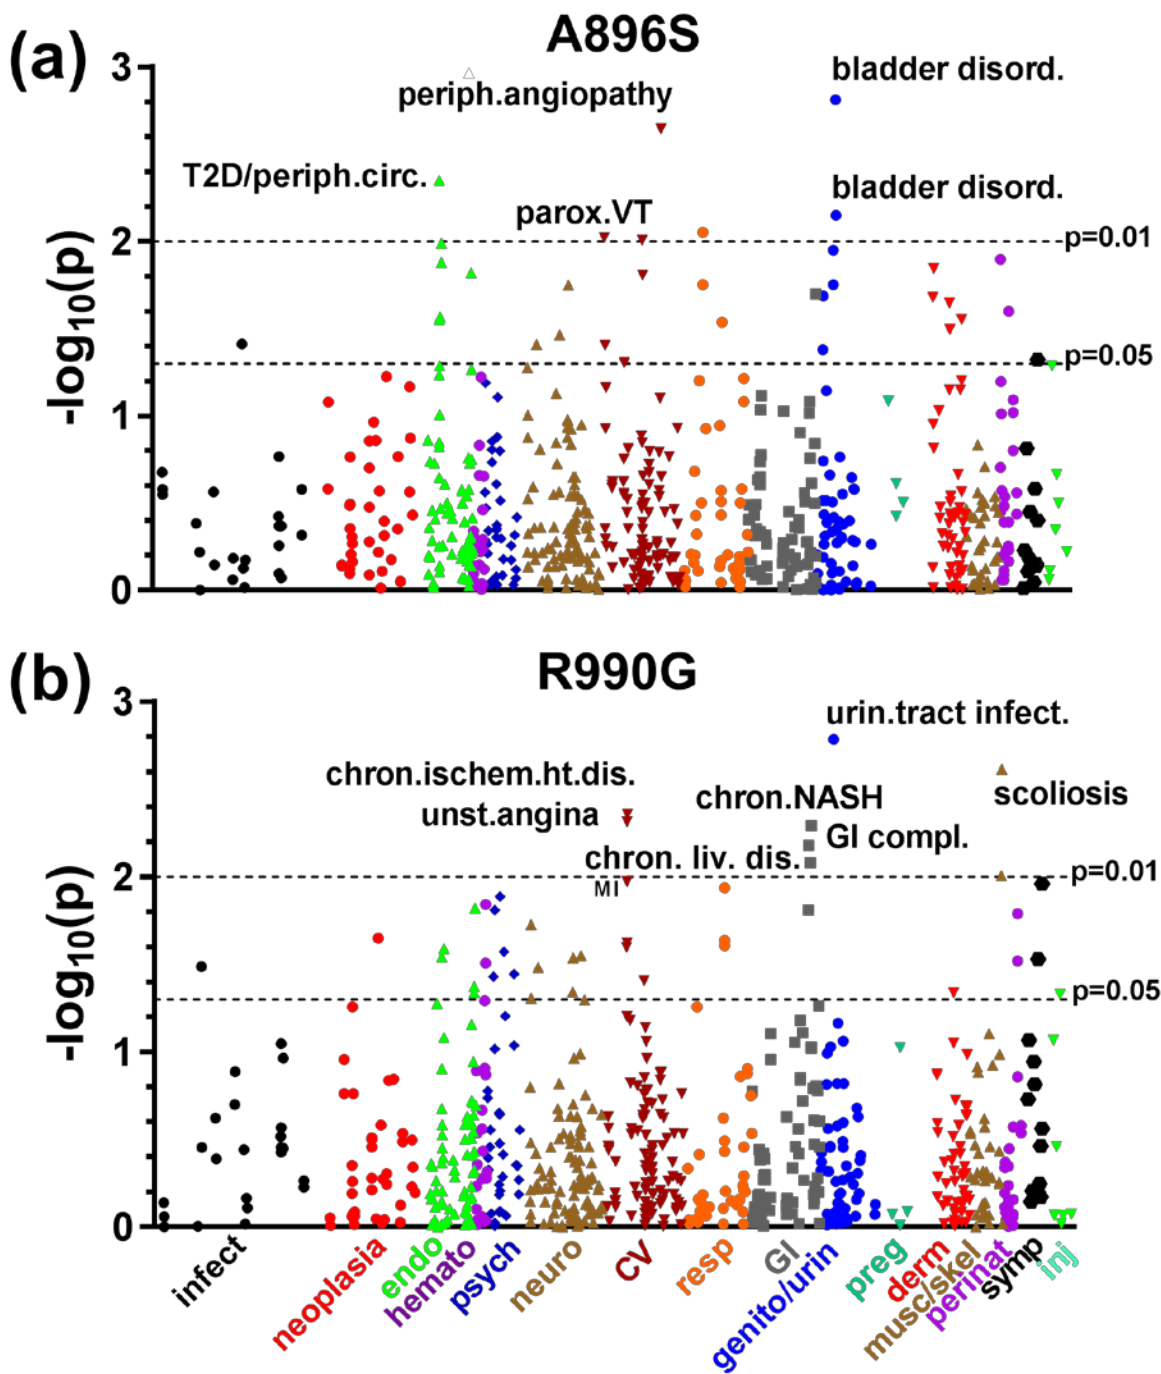

2

3

1 **Figure 2**

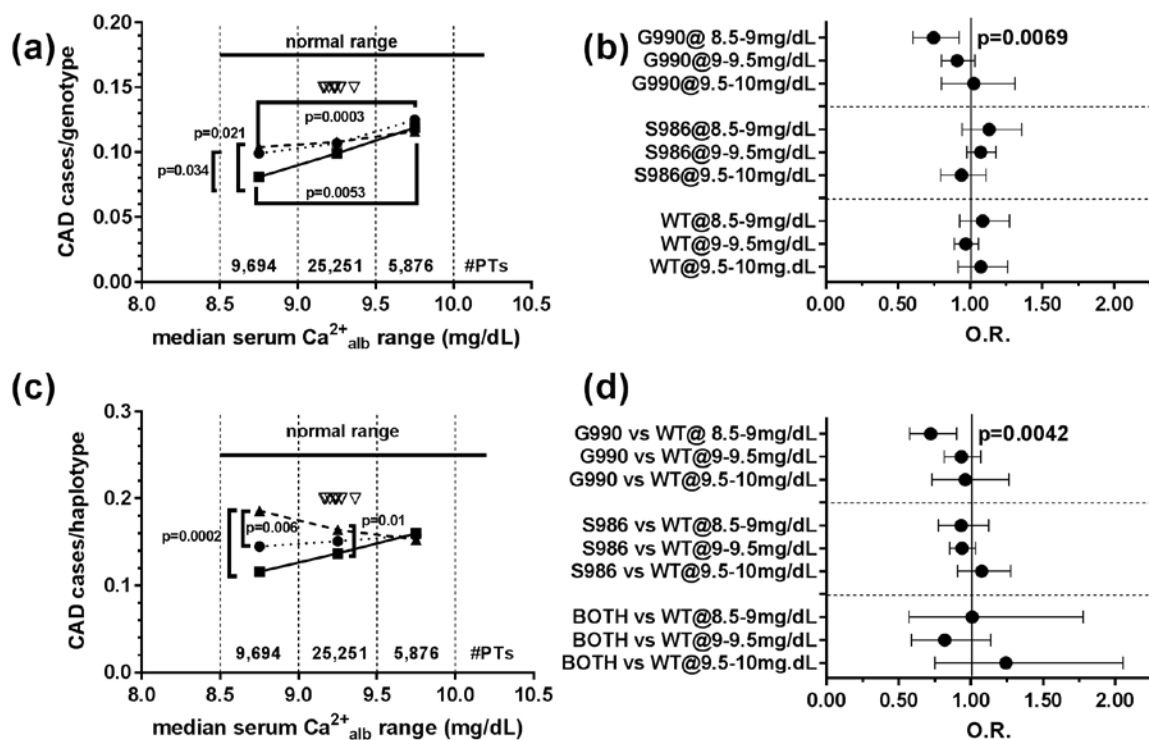

2

3

1 **Figure 3**

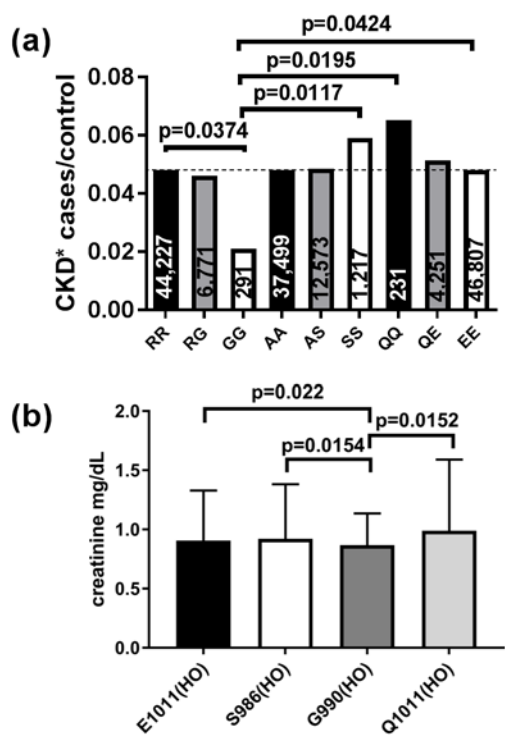

2
